# Supplementary material
Source: PubMed Central journal article supplement (PMC9256031)

## Supplementary Figure 1

*Conceptual Model*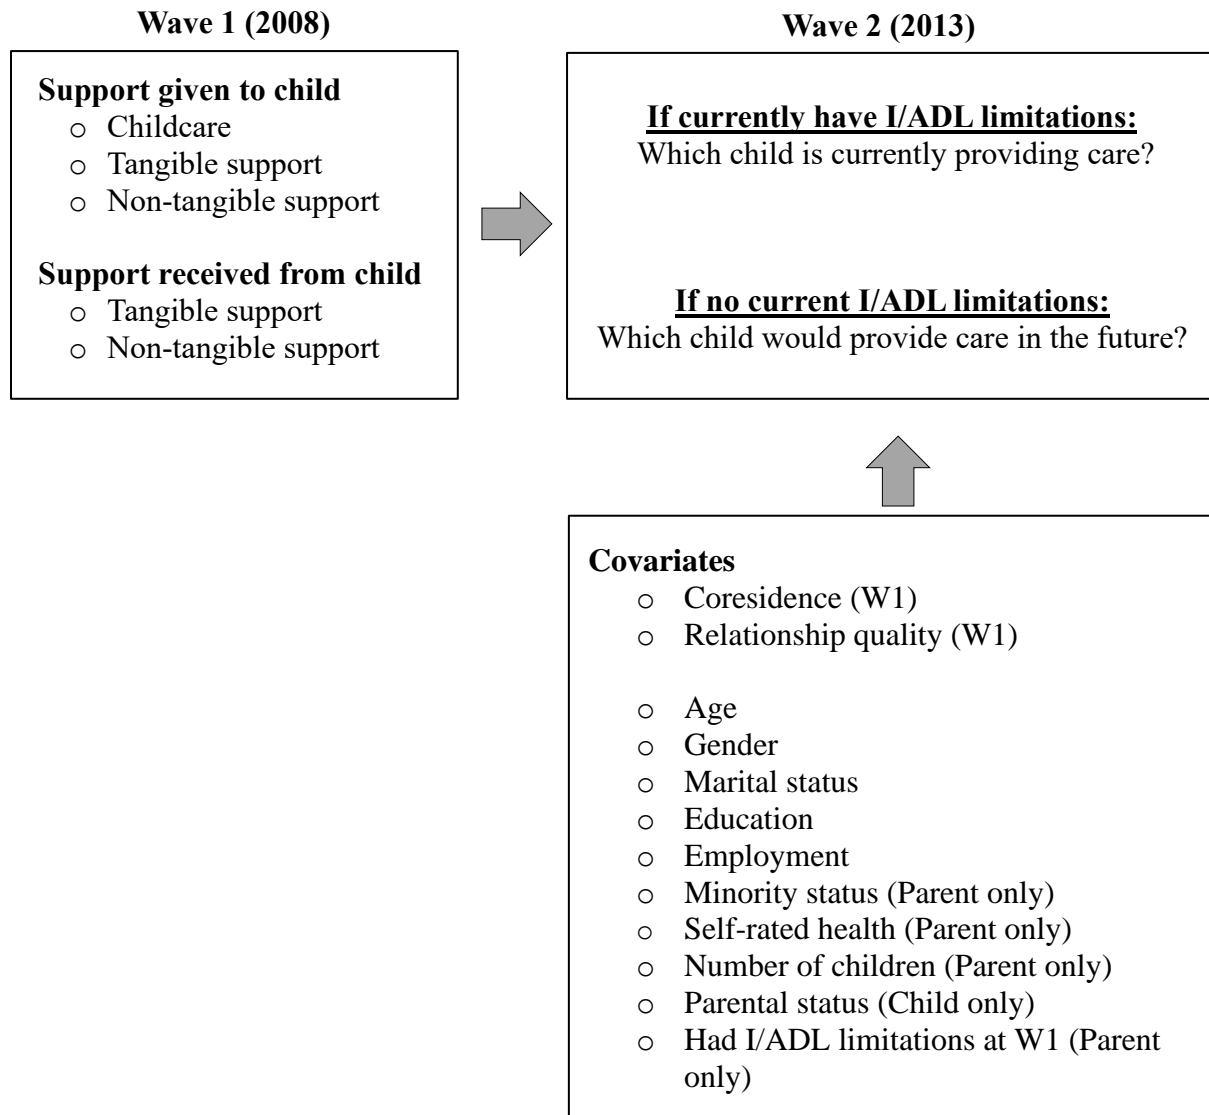

Supplement: gbac059_suppl_supplementary_material.pdf [file gbac059_suppl_supplementary_material.pdf]
